# Supplementary material for: AP-1 complex activation is a conserved signature of immune system aging and a potential regulator of inflammaging in human and mice
Source: Research Square preprint supplement (doi:10.21203/rs.3.rs-1051151/v1), 2021-11-17
Supplement: Supplementary file 1 [file 3330ecb470b9d638d2515609.xlsx]

## Sheet: Sheet1
Jun
Junb
Jund
Fos
Fosb
Fra1
Fra2
Atf
Atf2
Atf3
Atf4
Atf5
Atf6
Atf6b
Atf7
Batf
Batf2
Batf3
Jdp2
Maf
Mafa
Mafb
Maff
Mafg
Mafk
